# Supplementary material
Source: HighWire-hosted journal article supplement (https://bmjopenrespres.bmj.com/content/6/1/e000467)

Appendix: Enrollment

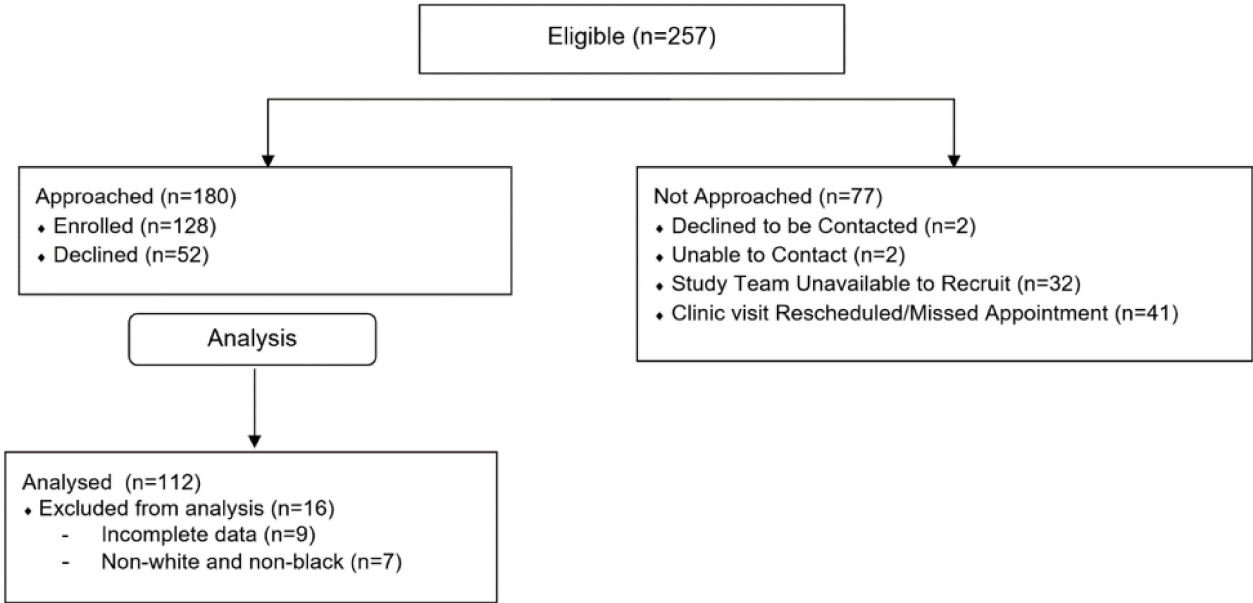

Supplement: inline-supplementary-material-1 [file inline-supplementary-material-1.pdf]
